# Supplementary material for: Both Irbit and Long-Irbit Bind to and Coordinately Regulate Cl-/hco3-Exchanger Ae2 Activity Through Modulating the Lysosomal Degradation of Ae2.
Source: Research Square preprint supplement (doi:10.21203/rs.3.rs-114077/v1), 2020-12-03

## Supplementary Information

### **Both IRBIT and Long-IRBIT bind to and coordinately regulate Cl<sup>-</sup>/HCO<sub>3</sub><sup>-</sup> exchanger AE2 activity through modulating the lysosomal degradation of AE2**

**Ryo Itoh<sup>a</sup>, Naoya Hatano<sup>b</sup>, Momoko Murakami<sup>a</sup>, Kosuke Mitsumori<sup>a</sup>, Tomoka Wakagi<sup>a</sup>, Yoshino Kanzaki<sup>a</sup>, Hiroyuki Kojima<sup>a</sup>, Katsuhiko Kawai<sup>c</sup>, Katsuhiko Mikoshiba<sup>d</sup>, Koichi Hamada<sup>a</sup>, and Akihiro Mizutani<sup>\*a</sup>**

<sup>a</sup>Department of Pharmacotherapeutics, Showa Pharmaceutical University, Machida, Tokyo 194-8543, Japan; <sup>b</sup>Division of Applied Cell Biology, Graduate School of Interdisciplinary Science and Engineering in Health Systems, Okayama University, Okayama 700-8530, Japan; <sup>c</sup>Laboratory of Cell and Tissue Biology, Keio University School of Medicine, Tokyo, 160-8582, Japan; Shanghai Institute for Advanced Immunochemical Studies, ShanghaiTech University, Shanghai, 201210, China

\*Correspondence to mizutani@ac.shoyaku.ac.jp

**Figure S1**

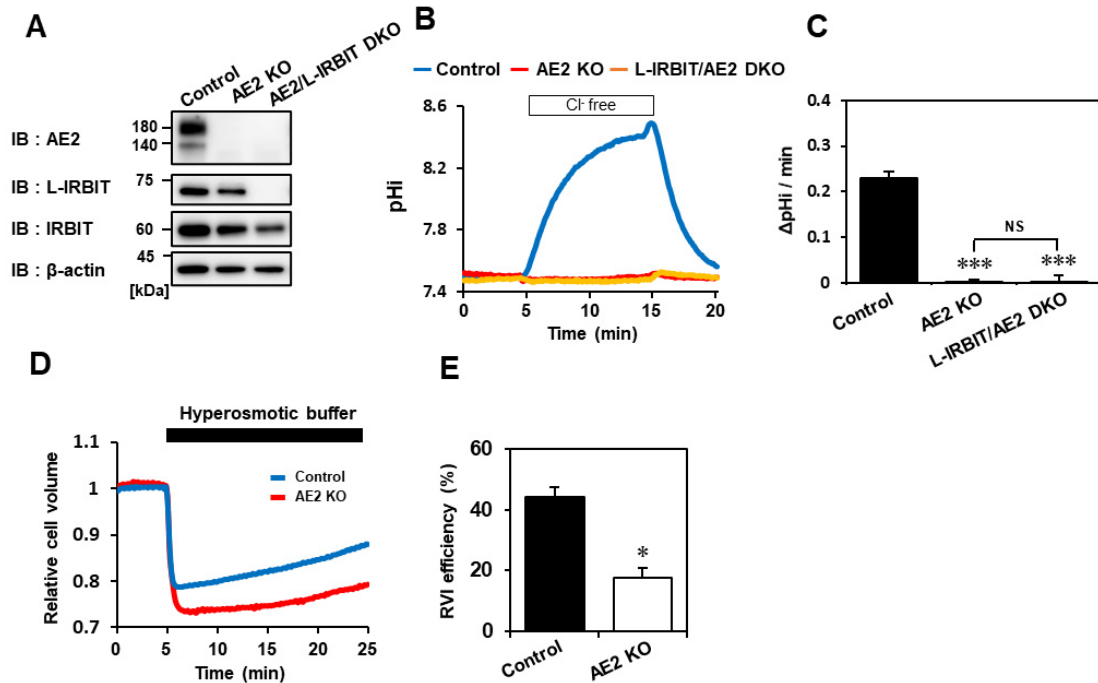

**Figure S1.  $\text{Cl}^-/\text{HCO}_3^-$  anion exchange activity and cell volume recovery in AE2- or AE2/L-IRBIT double knockout cells.** (A) AE2 and AE2/L-IRBIT double KO (DKO) cells were established by CRISPR/Cas9 strategy and their clones were verified for the expressions of IRBIT, Long-IRBIT and AE2 by immunoblot. (B) AE2 activity in AE2 KO cells or AE2/Long-IRBIT DKO cells was measured by intracellular pH changes (pHi) upon changing perfusion buffer from Cl<sup>-</sup>-containing to Cl<sup>-</sup>-free ringer buffers with SNARF1 pH sensitive dye. A representative plot of pHi changes obtained from control (blue), AE2 KO cells (red), and AE2/Long-IRBIT DKO cells (orange). (C) Average AE2 activity ( $\Delta\text{pHi}/\text{min}$ ) of each cell was  $0.23 \pm 0.2$  (WT),  $0.002 \pm 0.003$  (AE2 KO), and  $0.001 \pm 0.001$  (L-IRBIT/AE2 DKO).  $N=3$ , \*\*\* $P<0.001$ , N.S., no significance. (D) Cell volume recovery in AE2 KO cells was measured by fluorescence changes upon changing perfusion buffer from 300 mOsm buffer to 450 mOsm buffers with calcein-AM. A representative plot of fluorescence recovery rate as a relative cell volume from control (blue), AE2 KO clone1 (red). (E) RVI efficiency of each cells was  $44.1 \pm 3.3$ (WT),  $17.6 \pm 3.2$  (AE2 KO).  $N=3$ , \* $P < 0.05$ .

**Figure S2**

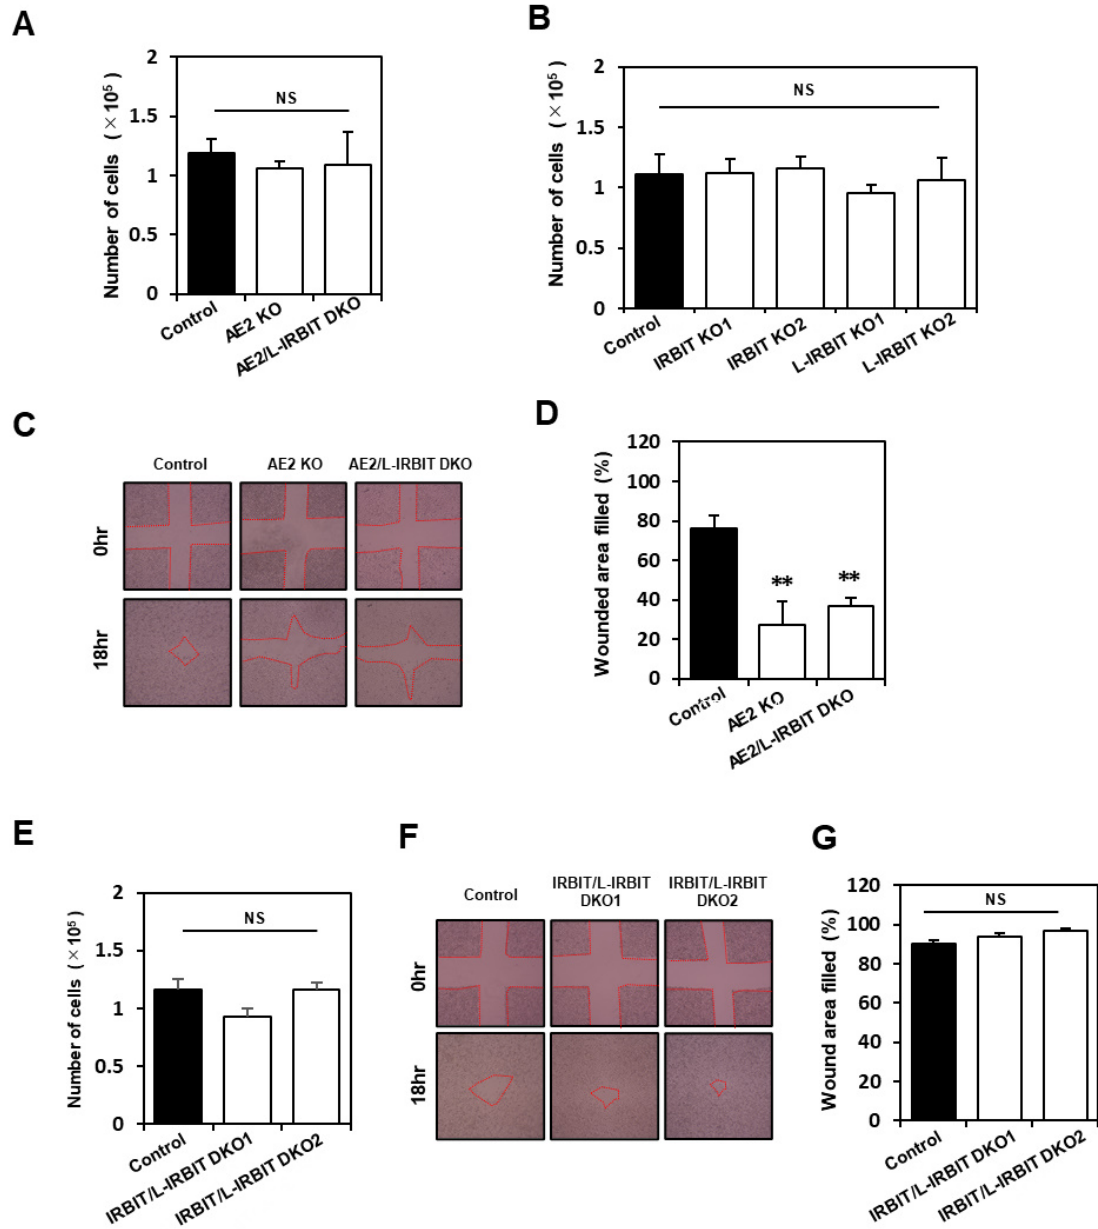

**Figure S2. Cell growth and cell migration of IRBIT family- or AE2 knockout cells.**

(A) The growth of control, AE2 KO and AE2/L-IRBIT double knockout (DKO) cells determined by direct cell count using a hemocytometer at 24 h after seeding. N=4, N.S., no significance. (B) The growth of control, IRBIT KO (IRBIT KO1, IRBIT KO2) and L-IRBIT KO (L-IRBIT KO1, L-IRBIT KO2) cells determined by direct cell count using a hemocytometer at 24 h. N=4, N.S., no significance. (C) The results of the wound healing assay were shown. Representative photomicrographs of the

wounded cell monolayer are shown. (D) Wound width was measured in 6 positions immediately after wounding and 18 h later in control, AE2 KO and AE2/Long-IRBIT DKO N=4,  $**P<0.01$ . (E) The growth of control, IRBIT/L-IRBIT DKO (IRBIT/L-IRBIT DKO1, IRBIT/L-IRBIT DKO2) cells determined by direct cell count using a hemocytometer at 24 h after seeding. N=4, N.S., no significance. (F) The results of the wound healing assay were shown. Representative photomicrographs of the wounded cell monolayer are shown. (G) Wound width was measured in 6 positions immediately after wounding and 18 h later in control and IRBIT/L-IRBIT DKO (IRBIT/L-IRBIT DKO1, IRBIT/L-IRBIT DKO2). N=4, N.S., no significance.

**Figure S3**

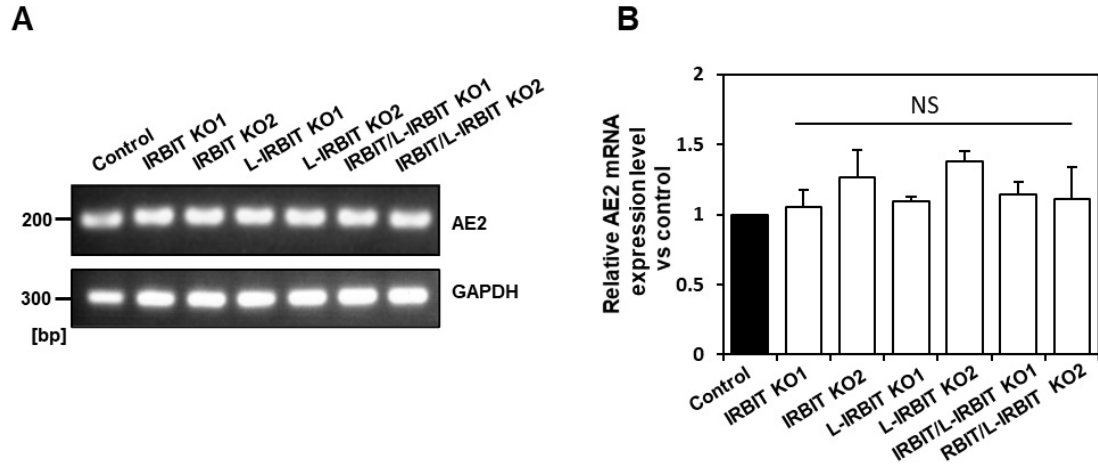

**Figure S3. mRNA expression level of AE2 in IRBIT family knockout cells.**

(A) mRNA expression level of AE2 and GAPDH were determined by RT-PCR using gene-specific primers. Representative data of amplified products by RT-PCR. (B) mRNA expression level of AE2 in each knockout cells was determined by qPCR using the delta Ct method ( $2^{-\Delta\Delta C_t}$ ) with GAPDH as an internal control. N=4, N.S., no significance.

The images below are original ones before trimmed for a proper layout of each figure.

**Figure 1A**

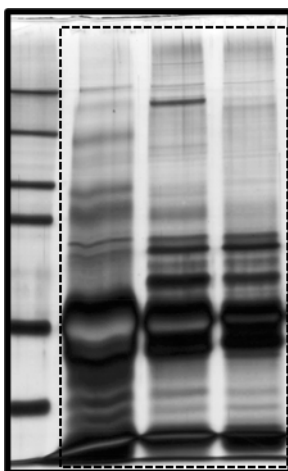

**Figure 1B**

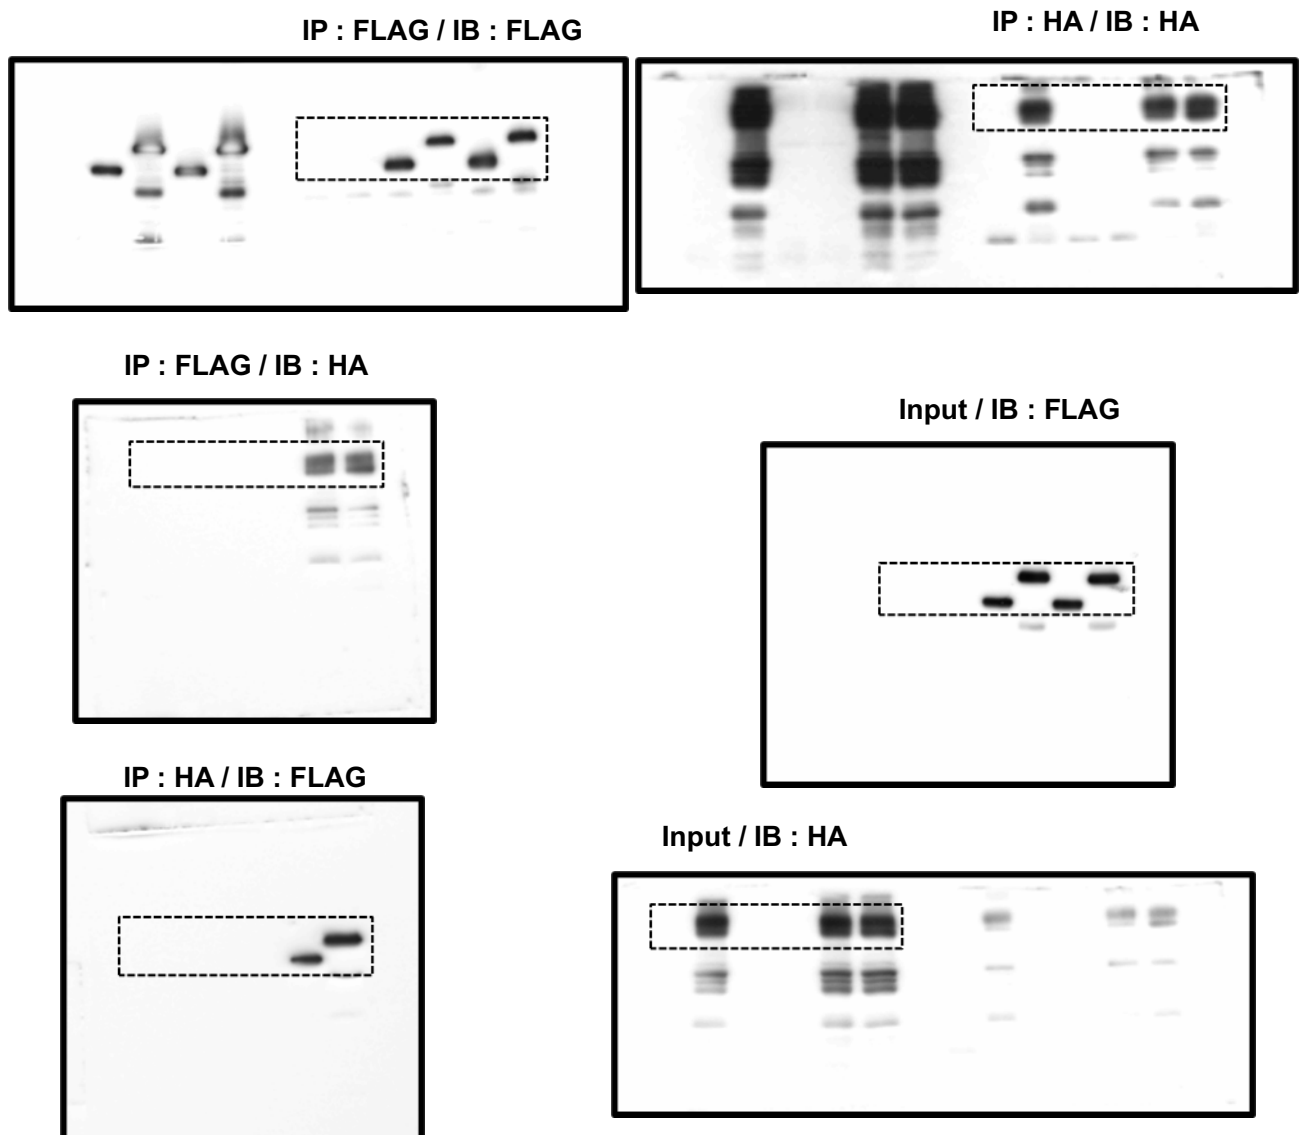

**Figure 2A**

**IB : AE2**

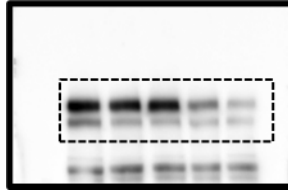

**IB : L-IRBIT**

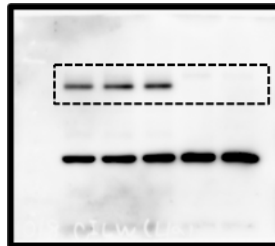

**IB : IRBIT**

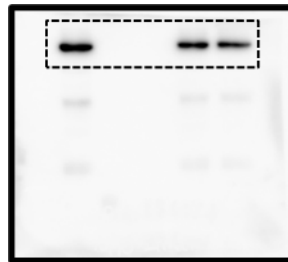

**IB :  $\beta$ -actin**

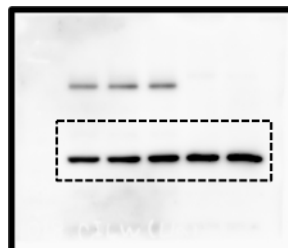



**Figure 4B**

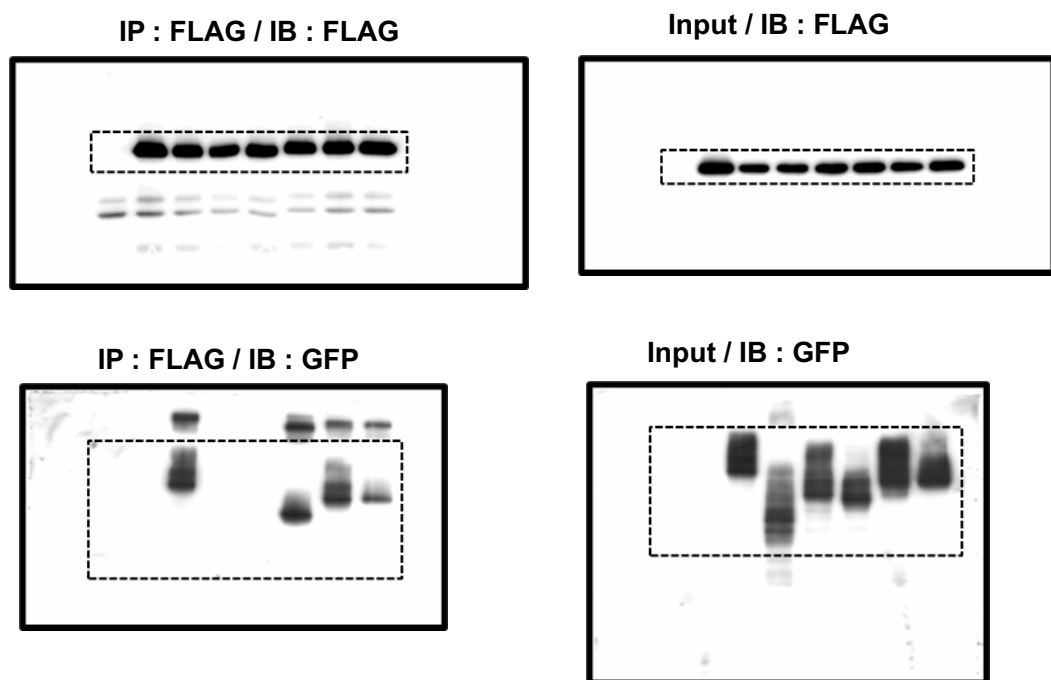

**Figure 4C**

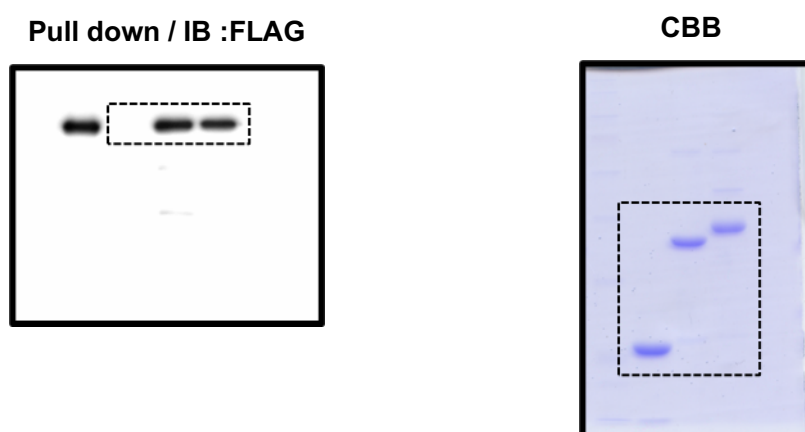

Figure 4D

Pull down / IB :FLAG

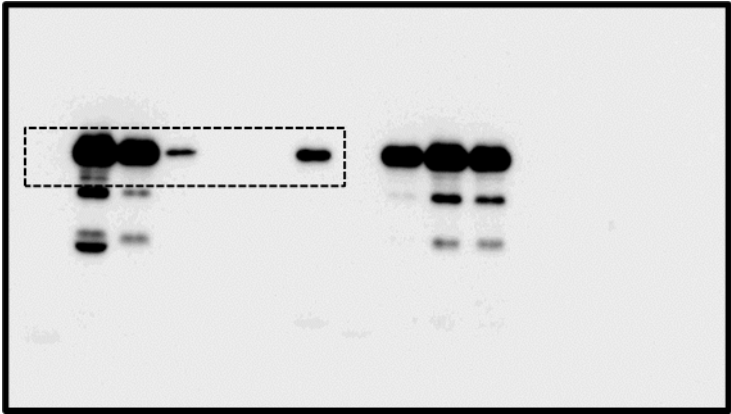

CBB

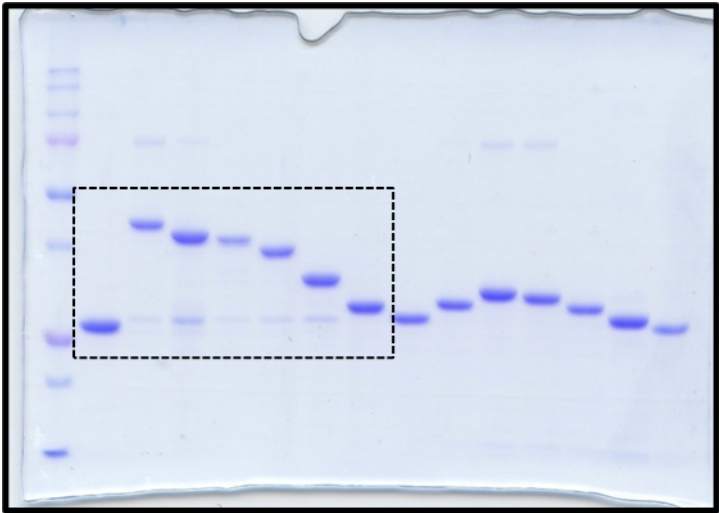

Pull down / IB :FLAG

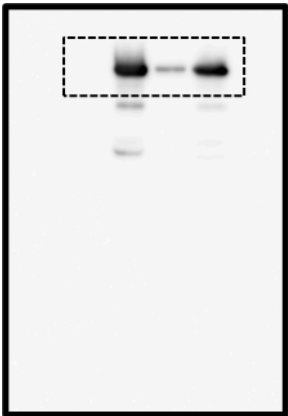

CBB

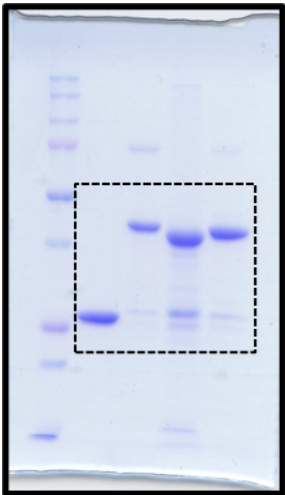

**Figure 4E**

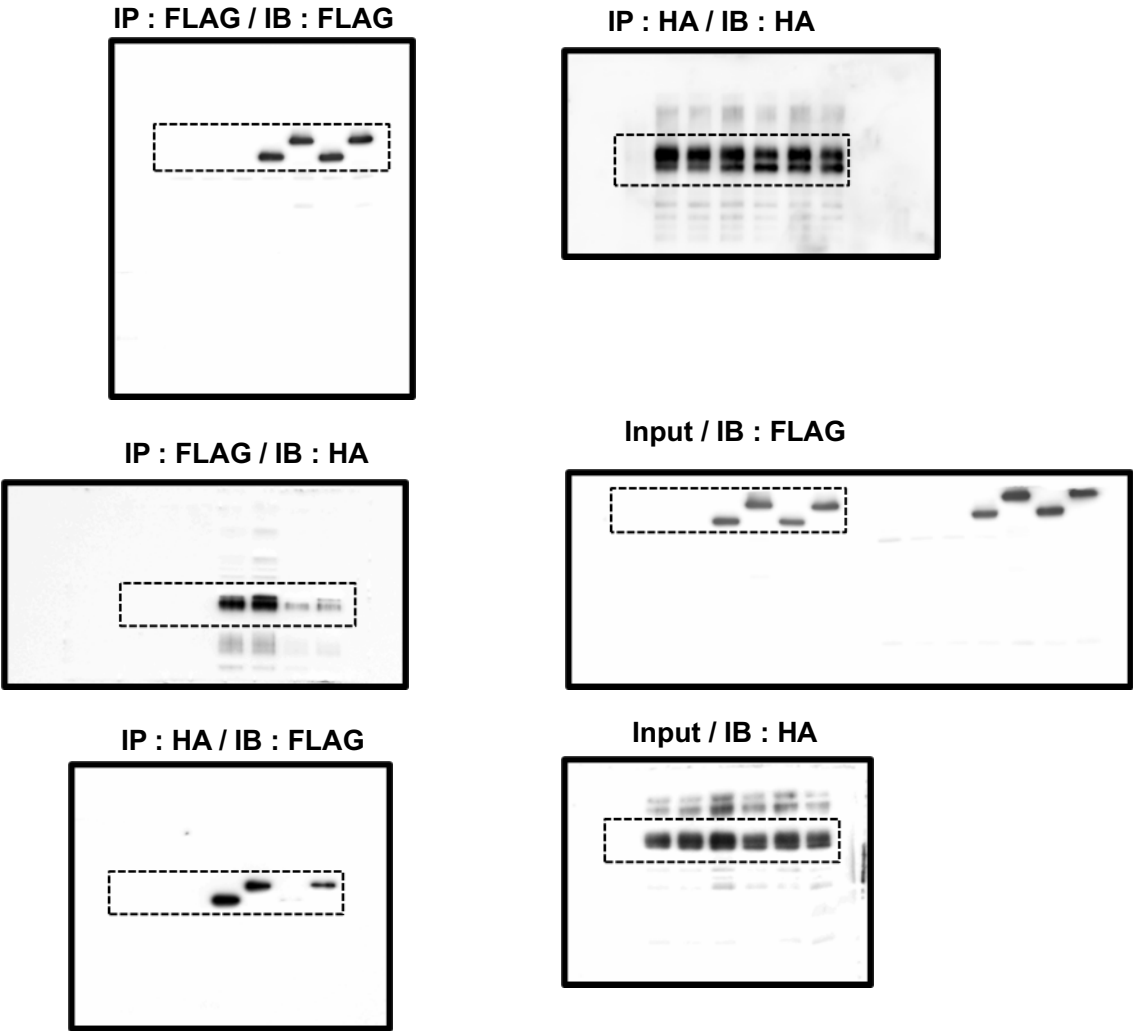

**Figure 5B**

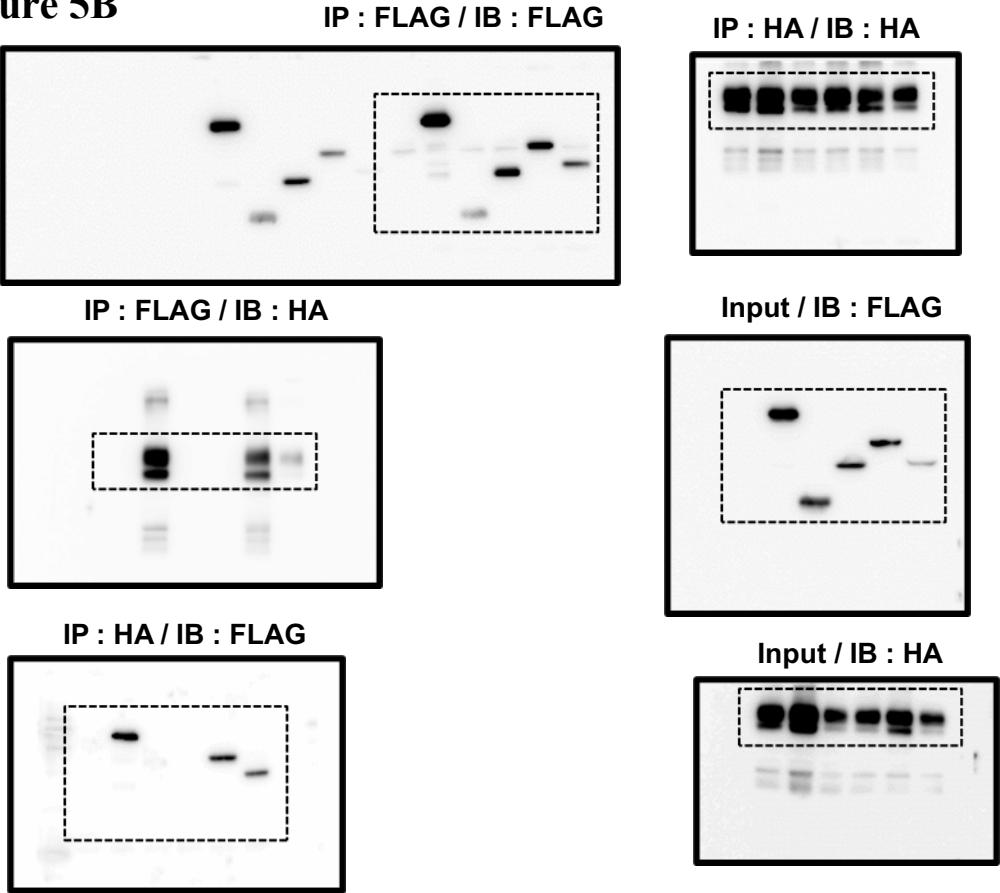

**Figure 5C**

**Pull down / IB :MBP**

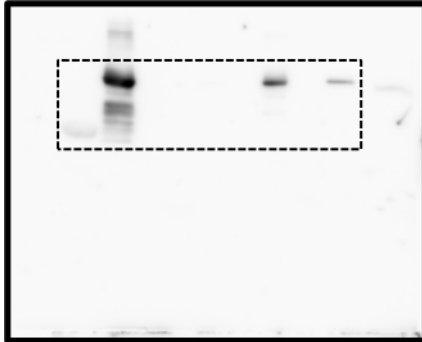

**CBB**

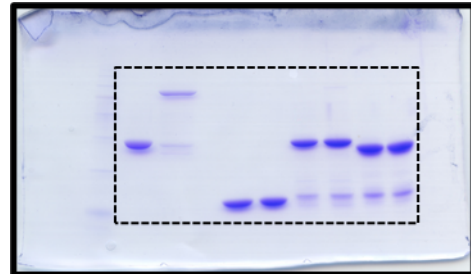

**Figure 6B**

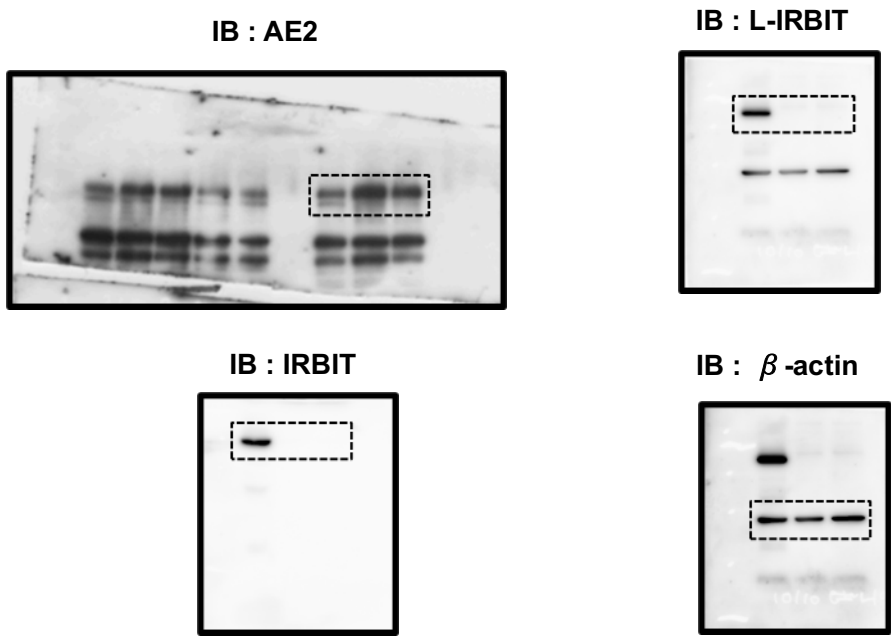

Figure 7A

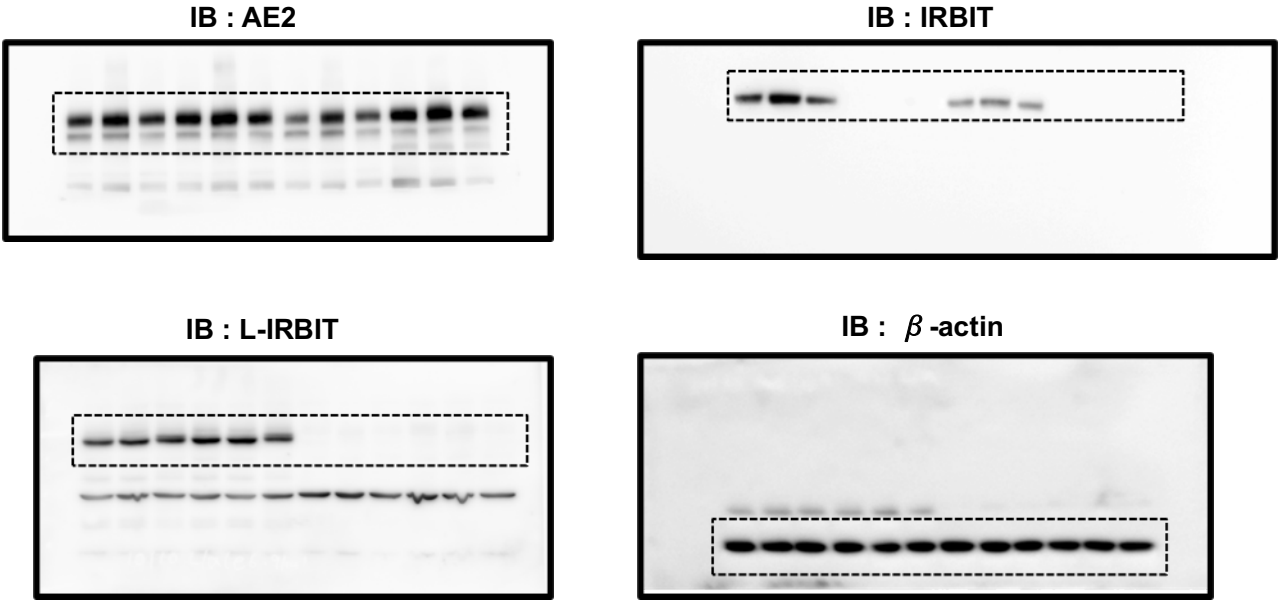

**Figure 7B**

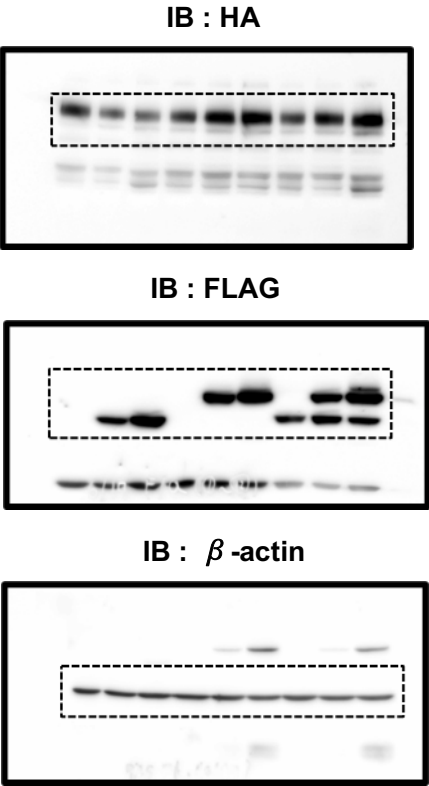

**Figure 7C**

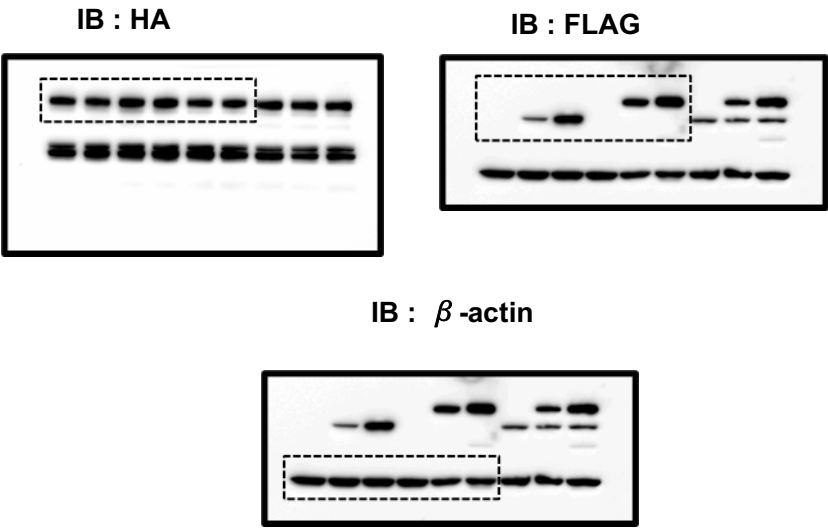



**Figure 7D**

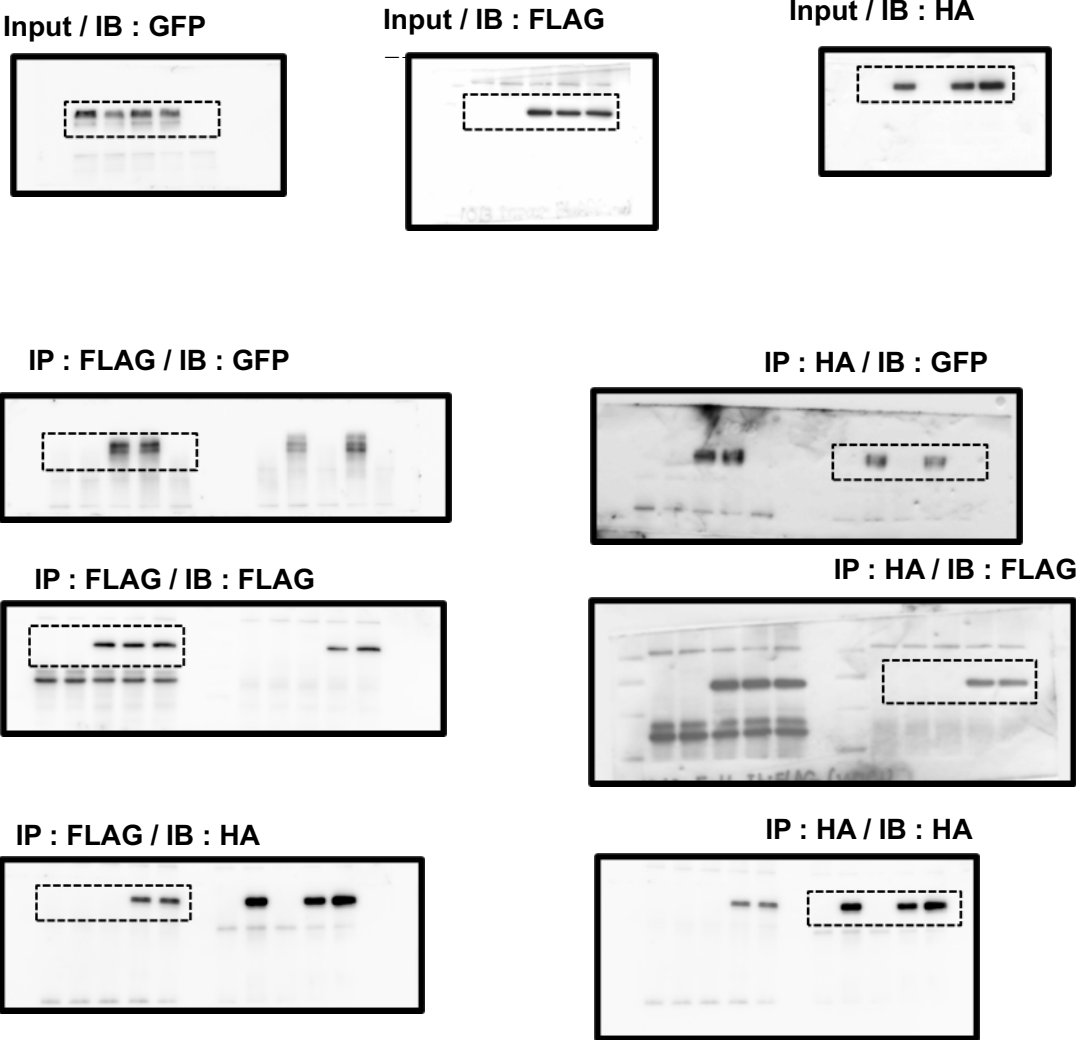

Figure S1A

IB : AE2

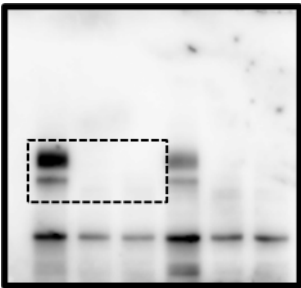

IB : L-IRBIT

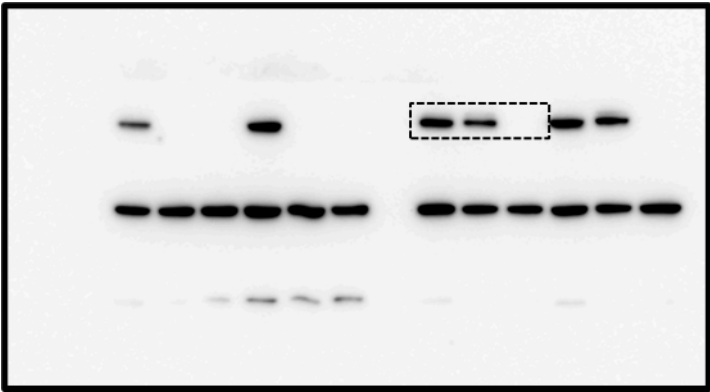

IB : IRBIT

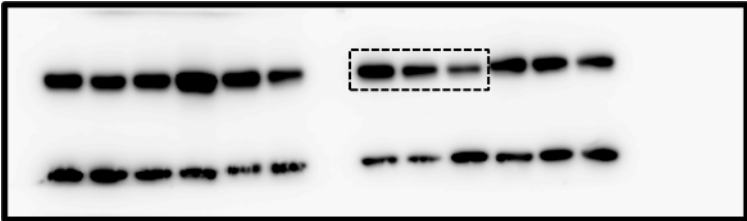

IB :  $\beta$ -actin

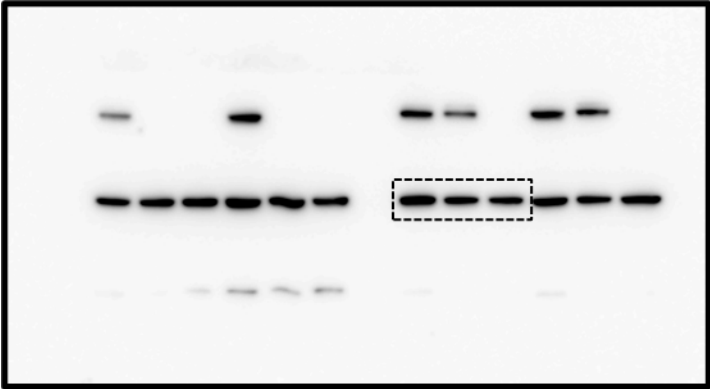

**Figure S3A**

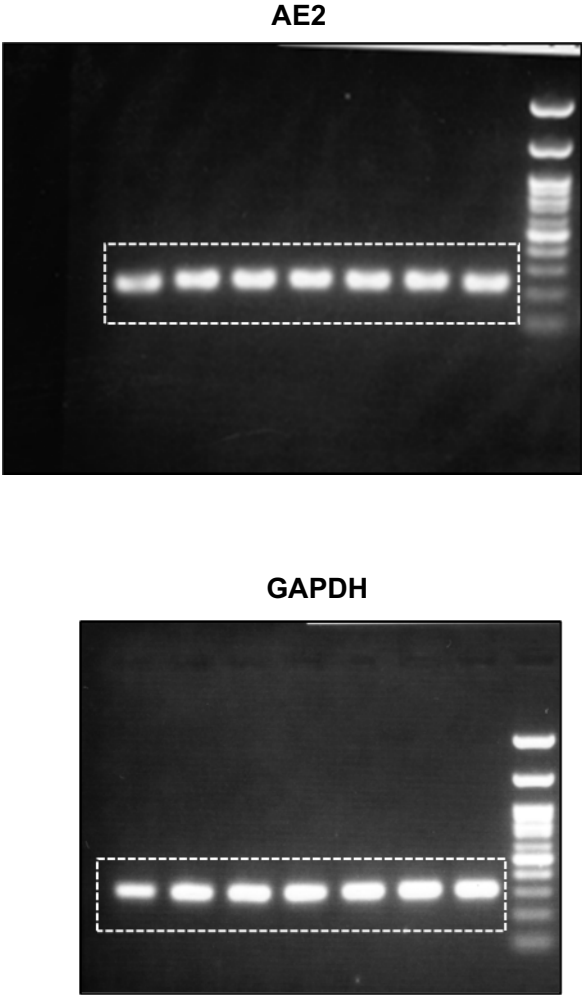

Supplement: Supplementary file 1 [file a0d4a13e0c5f7353410c0e44.pdf]
